# Supplementary material for: A Novel Device for Tension-Torsion Testing of Micro-Wires
Source: Royal Society of Chemistry journal article supplement (doi:10.1039/d3cp01243c), 2008-12-01
Supplement: d3cp01243c2.pdf [file d3cp01243c2.pdf]

## ***Supporting Information***

# **Impact of Spin-Phonon Coupling on Magnetic Relaxation of a Co(II) Single-Molecule Magnet**

Sakshi Nain, Manish Kumar, and Md. Ehesan Ali\*

*Institute of Nano Science and Technology, Sector-81, Mohali, Punjab-140306, India*

E-mail: ehesan.ali@inst.ac.in

## **Contents**

|          |                                             |            |
|----------|---------------------------------------------|------------|
| <b>1</b> | <b>Vertical Energies</b>                    | <b>S2</b>  |
| <b>2</b> | <b>Selection of nroots for MCSCF method</b> | <b>S2</b>  |
| <b>3</b> | <b>Magnetization plot</b>                   | <b>S4</b>  |
| <b>4</b> | <b>Energy Profile Diagram</b>               | <b>S5</b>  |
| <b>5</b> | <b>Results on experimental geometry</b>     | <b>S7</b>  |
| <b>6</b> | <b>Extended Space Results</b>               | <b>S7</b>  |
| <b>7</b> | <b>Geometrical Parameters</b>               | <b>S9</b>  |
| <b>8</b> | <b>Spin-vibrational coupling</b>            | <b>S12</b> |

# 1 Vertical Energies

Geometry optimizations have been performed using density functional theory in all the possible spin-states (HS, LS) at B3LYP<sup>1</sup>/def2-TZVP level for all the four complexes in *ORCA* programme package.<sup>2</sup> Later on, the ground spin-state geometry was used for multi-reference single point calculations of CASSCF/NEVPT2.<sup>3</sup> The vertical excitation energies computed at the ground-spin state geometry of the respective complexes obtained from DFT as well as CASSCF/NEVPT2 are tabulated in Table S1.

Table S1: Adiabatic and vertical excitation energies between ground and first excited state computed at B3LYP/def2-TZVP level and CASSCF/NEVPT2 for all the studied Co complexes. All the calculated energies are represented in kJ/mol.

| Complex  | DFT                      |                           | SA-CASSCF                 | SA-NEVPT2                 |
|----------|--------------------------|---------------------------|---------------------------|---------------------------|
|          | $\Delta E_{LS-HS}^{adb}$ | $\Delta E_{LS-HS}^{vert}$ | $\Delta E_{LS-HS}^{vert}$ | $\Delta E_{LS-HS}^{vert}$ |
| <b>1</b> | 32.60                    | 43.89                     | 194.99                    | 139.80                    |
| <b>2</b> | 83.62                    | 126.49                    | 161.80                    | 139.71                    |
| <b>3</b> | 73.01                    | 105.28                    | 152.92                    | 112.50                    |
| <b>4</b> | 83.28                    | 79.47                     | 219.11                    | 200.68                    |

## 2 Selection of nroots for MCSCF method

Apart from choosing the active space, selection of roots for particular multiplicity of different spin-states is also crucial for appropriate convergence of the wavefunction and obtaining accurate results with MCSCF (multi-configurational self-consistent field) theory based calculations. The criteria of picking up nroots is to include only the notable low-lying states of different multiplicities and precluding higher lying states.<sup>4</sup> Thus, the contribution of lower multiplicity roots or excited states is also accounted.<sup>5</sup> Initially, all the possible roots have been considered to perform multireference calculations for all the respective complexes (Table S2). Later on, only those multiplets lying in low-energy window which have a significant role in mixing of states are taken into account for SA-CASSCF calculations.

Table S2: Computed  $D$  values ( $\text{cm}^{-1}$ ) and  $|E/D|$  quotients employing CASSCF+NEVPT2 method on optimized geometries of the studied Co complexes using all the possible roots of the respective multiplets.

| Comp.                | CAS   | Nroots | $D$     | $ E/D $ |
|----------------------|-------|--------|---------|---------|
| <b>1<sup>a</sup></b> | (7,5) | 10,40  | -134.69 | 0.0070  |
| <b>2</b>             | (8,5) | 10,15  | 53.16   | 0.2522  |
| <b>3<sup>b</sup></b> | (8,5) | 10,15  | -87.92  | 0.0309  |
| <b>4</b>             | (7,5) | 10,40  | 77.94   | 0.2887  |

In observance of this, we have plotted the energy spectra of roots of multiplets obtained from SA-CASSCF(7,5) method using all possible 10 quartets and 40 doublet states for complex **1** (Figure S1).

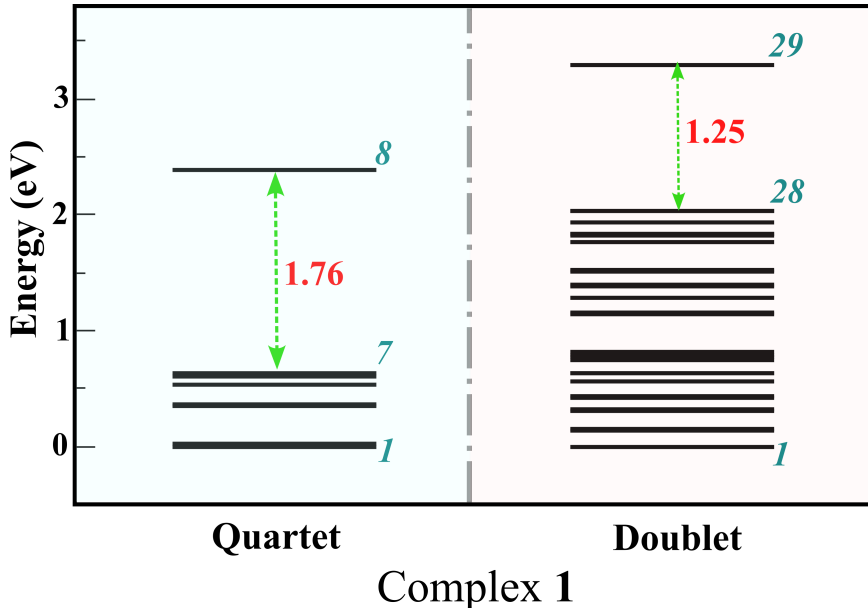

Figure S1: Computed energy spectra of multiplets obtained from converged SA-CASSCF(7,5) calculation using 10 quartets and 40 doublet states.

The plot clearly depicts the large energy gap between 7<sup>th</sup> and 8<sup>th</sup> quartet and 28<sup>th</sup> and 29<sup>th</sup> doublet, which explains the selection of only 7 quartets and 28 doublets for this system. In a similar way, the roots for rest of the other investigated complexes have been chosen.

It is noteworthy to mention that due to the lack of ideal symmetry in the investigated complexes, it is difficult to define all of the three axes precisely. Therefore, we have aligned

Table S3: AILFT computed orbital eigenfunctions of all the respective complexes.

| Energy (cm <sup>-1</sup> )                          | $d_{z^2}$    | $d_{xy}$ | $d_{yz}$ | $d_{x^2-y^2}$ | $d_{xz}$ |
|-----------------------------------------------------|--------------|----------|----------|---------------|----------|
| <b>Complex 1</b> ( $z$ -axis is $\perp$ to Cp ring) |              |          |          |               |          |
| 0.00                                                | -0.01        | -0.14    | 0.03     | 0.70          | 0.70     |
| 143.50                                              | 0.03         | 0.01     | 0.15     | 0.70          | -0.70    |
| 5352.5                                              | <b>0.91</b>  | 0.04     | 0.40     | -0.06         | 0.06     |
| 7439.9                                              | -0.39        | 0.43     | 0.81     | -0.06         | 0.10     |
| 9108.4                                              | 0.15         | 0.89     | -0.41    | 0.13          | 0.06     |
| <b>Complex 2</b> ( $z$ -axis is $\perp$ to Cp ring) |              |          |          |               |          |
| 0.00                                                | -0.63        | 0.22     | -0.34    | 0.11          | -0.65    |
| 745.7                                               | 0.07         | 0.09     | 0.19     | 0.97          | 0.03     |
| 1158.2                                              | <b>0.70</b>  | -0.15    | -0.06    | 0.00          | -0.70    |
| 3562.9                                              | -0.21        | 0.03     | 0.92     | -0.16         | -0.29    |
| 5697.8                                              | 0.26         | 0.96     | 0.02     | -0.12         | 0.05     |
| <b>Complex 3</b> ( $z$ -axis is along Co-CO bond)   |              |          |          |               |          |
| 0.00                                                | 0.01         | -0.91    | -0.41    | 0.03          | -0.04    |
| 3396.3                                              | -0.08        | -0.41    | 0.91     | -0.04         | -0.01    |
| 4129.2                                              | <b>-0.71</b> | 0.00     | -0.04    | 0.43          | 0.56     |
| 7179.5                                              | 0.02         | 0.03     | 0.04     | 0.80          | -0.60    |
| 12107.7                                             | -0.70        | 0.04     | -0.07    | -0.41         | -0.58    |
| <b>Complex 4</b> ( $z$ -axis is along Co-Br bond)   |              |          |          |               |          |
| 0.00                                                | -0.61        | 0.00     | 0.00     | -0.34         | 0.72     |
| 448.3                                               | 0.00         | 0.51     | 0.86     | -0.01         | 0.00     |
| 1479.8                                              | -0.05        | 0.01     | 0.01     | 0.92          | 0.39     |
| 8124.6                                              | <b>-0.79</b> | 0.02     | -0.01    | 0.20          | -0.57    |
| 8439.2                                              | 0.02         | 0.86     | -0.51    | 0.00          | 0.01     |

the complexes in the specified direction of  $z$ -axis which is perpendicular to the plane of Cp ring for complex 1 and 2, while it is along Co-CO and Co-Br bonds for complex 3 and 4, respectively. The  $d_{z^2}$  orbital is chosen such that it is oriented towards the  $z$ -axis of the reference frame. Subsequently, we have visualised and analysed the LFT MOs, further assigning the other orbitals accordingly.

### 3 Magnetization plot

Figure S2 depicts the temperature dependent behaviour of complex **1** as observed via a decrease in the  $\chi^{-1}$  value with fall in temperature.

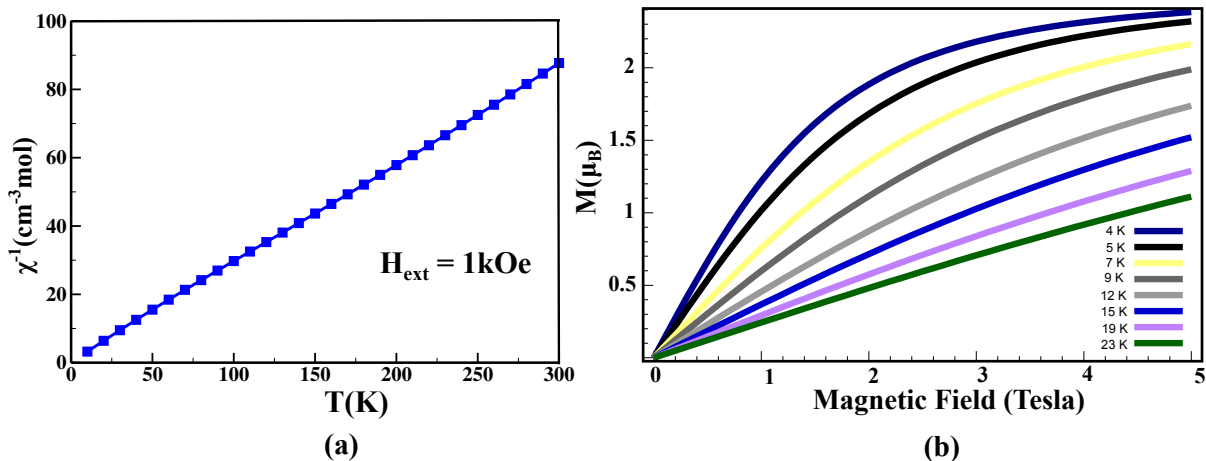

Figure S2: (a) Inverse magnetic susceptibility ( $\chi^{-1}$ ) vs temperature (T) plot for complex **1** with an externally applied magnetic field of  $H_{ext} = 1 \text{ kOe}$  at  $T = 0\text{-}300 \text{ K}$ . Blue square symbols represent the simulated  $\chi^{-1}$  values, using CASSCF+NEVPT2 approach. (b) Field dependent magnetization data of complex **1** simulated at external applied magnetic fields between  $H_{ext} = 0\text{-}5 \text{ T}$  using CASSCF+NEVPT2 at indicated temperatures. Both the plots are in good agreement with the experimentally measured data.<sup>6</sup>

## 4 Energy Profile Diagram

Complex **2** and **3** are found to be as non Kramers system owing integral total spin and hence are inclined to show reversal of the magnetization via QTM in zero-field.<sup>7</sup> So, their qualitative magnetic relaxation pathways along with Kramer systems of complex **1** and **4** have been displayed using CASSCF+NEVPT2 approach in Figure S3. For complex **2**, the ground state happens to be  $M_S = 0$  and hence possesses barrierless potential. In case of complex **3**, the computed  $D$  value is negative. While, there is considerable QTM triggered by rhombic ZFS parameter, which inhibits its way to exhibit slow relaxation of magnetization without any applied field.<sup>8</sup> For Kramer systems of complex **1** and **4**, the results are in good agreement to that of computed by using SINGLE\_ANISO approach except for the probability of QTM in ground state for complex **4**.

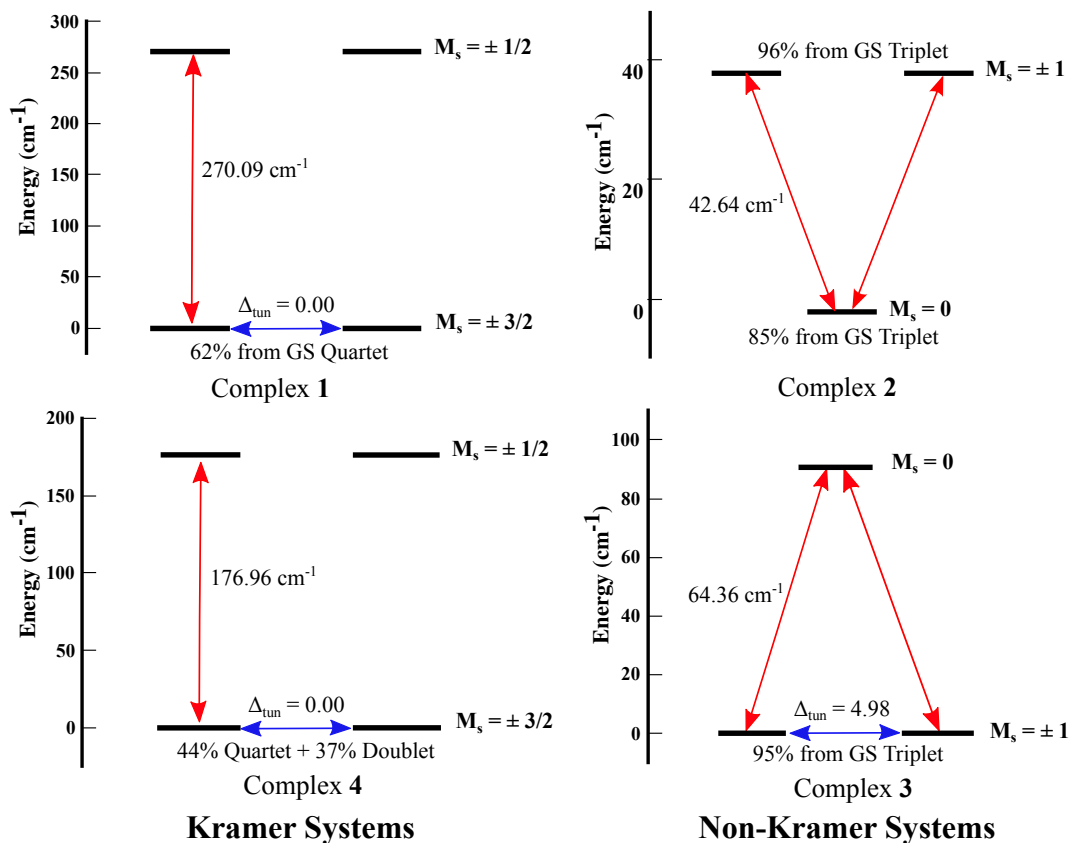

Figure S3: Qualitative mechanism of the lowest three spin-orbit states for Non-Kramer system of complex **2**, **3** and lowest four spin-orbit states for Kramer system of complex **1**, **4** computed from CASSCF+NEVPT2 method.

## 5 Results on experimental geometry

To check the impact of optimization on ZFS parameters, multi-configurational CASSCF+NEVPT2 calculations have also been conducted on experimental reported X-ray crystal structures' geometries for all the chosen complexes. However, only minor changes in the magnitude of axial and rhombic ZFS parameters have been observed keeping the sign consistent as of obtained from optimized geometries. The computed  $D$  and  $|E/D|$  parameters are gathered in Table S4.

Table S4: Computed  $D$  values ( $\text{cm}^{-1}$ ) and  $|E/D|$  quotients employing CASSCF+NEVPT2 method on experimentally reported X-ray crystal structures' geometries of all the studied Co complexes.

| Comp.                | CAS   | Nroots | SA-CASSCF |         | SA-NEVPT2 |         |
|----------------------|-------|--------|-----------|---------|-----------|---------|
|                      |       |        | $D$       | $ E/D $ | $D$       | $ E/D $ |
| <b>1<sup>a</sup></b> | (7,5) | 7,28   | -142.80   | 0.0052  | -148.06   | 0.0035  |
| <b>2</b>             | (8,5) | 7,5    | 74.56     | 0.2096  | 55.73     | 0.1545  |
| <b>3<sup>b</sup></b> | (8,5) | 7,5    | -165.99   | 0.0171  | -41.80    | 0.0600  |
| <b>4</b>             | (7,5) | 7,28   | -93.91    | 0.2528  | 78.53     | 0.3034  |

## 6 Extended Space Results

For complex 4, the axial ZFS parameter was found to have opposite sign with CASSCF and NEVPT2 method. To solve this puzzle related to sign of  $D$  value, the active space was extended to further include the exterior double  $d$ -shell.

Table S5: Computed  $D$  values ( $\text{cm}^{-1}$ ) and  $|E/D|$  quotients employing different multi-reference methods and active space of 10 orbitals for all the studied Co complexes.

| Comp.                | CAS    | Nroots | SA-CASSCF |         | SA-NEVPT2 |         | QD-NEVPT2 |         |
|----------------------|--------|--------|-----------|---------|-----------|---------|-----------|---------|
|                      |        |        | $D$       | $ E/D $ | $D$       | $ E/D $ | $D$       | $ E/D $ |
| <b>1<sup>a</sup></b> | (7,10) | 2,3    | -150.62   | 0.0001  | -151.27   | 0.0001  | -151.28   | 0.0001  |
| <b>2</b>             | (8,10) | 5,5    | 53.66     | 0.2922  | 53.69     | 0.3012  | 50.47     | 0.3132  |
| <b>3<sup>b</sup></b> | (8,10) | 2,3    | -118.60   | 0.0000  | -103.14   | 0.0000  | -103.51   | 0.0000  |
| <b>4</b>             | (7,10) | 3,2    | 70.77     | 0.2744  | 74.43     | 0.2679  | 74.38     | 0.2674  |

The computed ZFS parameters using the active space of CAS (7,10) with three quartet and two doublets are tabulated in Table S5. These calculations certainly confirm the positive sign of  $D$  for this complex. The qualitative  $d$ -orbital splitting pattern obtained from CAS(7,10)+NEVPT2 method for complex **4** is shown in Figure S4. The ground state electronic configuration with 92% occupation probability is  $d_{x^2-y^2}^2 d_{yz}^2 d_z^1 d_{xy}^1 d_{xz}^1$  following the Aufbau rule. Here, the first electronic excitation is happening from  $d_{yz}$  to  $d_z^2$  orbital i.e. between different  $|m_l|$  state, leading to positive contribution to the  $D$  value. While, the next excitation promotes electron from  $d_{x^2-y^2}$  to  $d_{yz}$  orbital with  $d_{x^2-y^2}^1 d_{yz}^2 d_z^2 d_{xy}^1 d_{xz}^1$  electronic configuration.

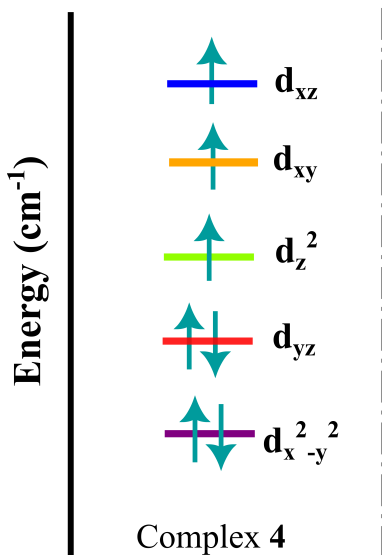

Figure S4: Qualitative  $d$ -orbital energy levels with ground state occupation using CAS(7,10) space for complex **4**.

This again contributes to the positive  $D$  parameter and hence this complex is concluded with positive magnetic anisotropy. Figure S5 shows the active orbitals used in active space of CAS(7,10) for complex **4** with their occupation in parenthesis.

It is clear from the Figure S5 that the first five orbitals in the active space of CAS(7,10) are significantly occupied while the occupation for extended double  $d$ -shell orbitals is reduced.



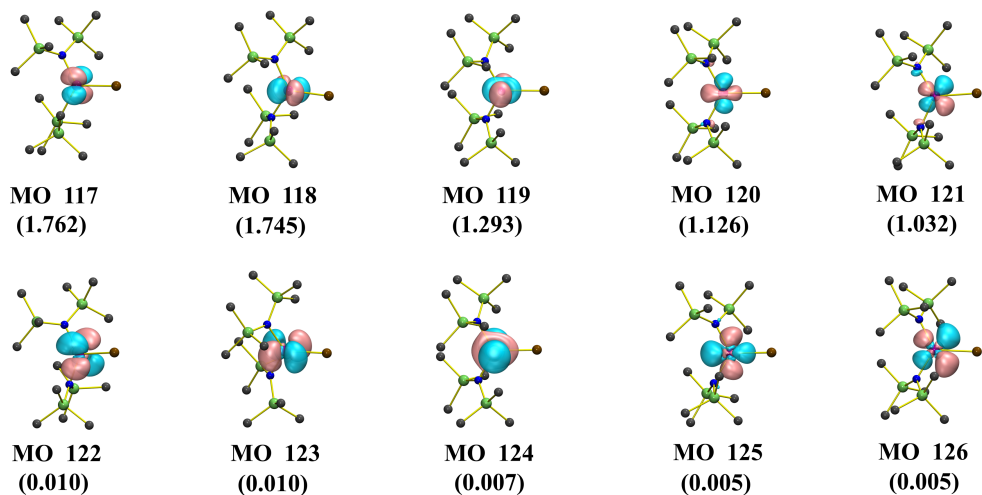

Figure S5: CAS(7,10) active space orbitals for complex **4** with their occupation in parenthesis.

## 7 Geometrical Parameters

For all the examined complexes, the geometries have been optimized using density functional theory. The comparison of geometrical parameters, including bond length and bond angles, between optimized geometries and previously reported X-ray crystal structure geometries have been done in Table S6-S9. The optimized geometries with marked atoms for complex **3** and **4** are shown in Figure S6.

Table S6: Compared structural parameters of complex **1** using the experimentally reported X-Ray crystal structure, DFT optimized geometry and Gaussian optimized geometry.

| Parameters             | Exp geom.        | Opt geom. | Deviation(%) |
|------------------------|------------------|-----------|--------------|
|                        | Bond Distance(Å) |           |              |
| Co-Cp' <sub>cent</sub> | 1.841            | 1.882     | -2.23        |
| N-Si                   | 1.724            | 1.727     | -0.17        |
| Co-N                   | 1.870            | 1.879     | -0.48        |
|                        | Bond Angle(°)    |           |              |
| ∠Cp'-Co-N              | 171.64           | 168.35    | 1.92         |

Table S7: Compared structural parameters of complex **2** between the experimentally reported X-Ray crystal structure and optimized geometry.

| Parameters            | Exp geom.        | Opt geom. | Deviation(%) |
|-----------------------|------------------|-----------|--------------|
|                       | Bond Distance(Å) |           |              |
| Co-Cp <sub>cent</sub> | 1.750            | 1.855     | -6.00        |
| C-N                   | 1.441            | 1.431     | 0.69         |
| Co-C                  | 1.946            | 1.932     | 0.72         |
|                       | Bond Angle(°)    |           |              |
| ∠Cp-Co-C              | 55.73            | 55.95     | -0.39        |

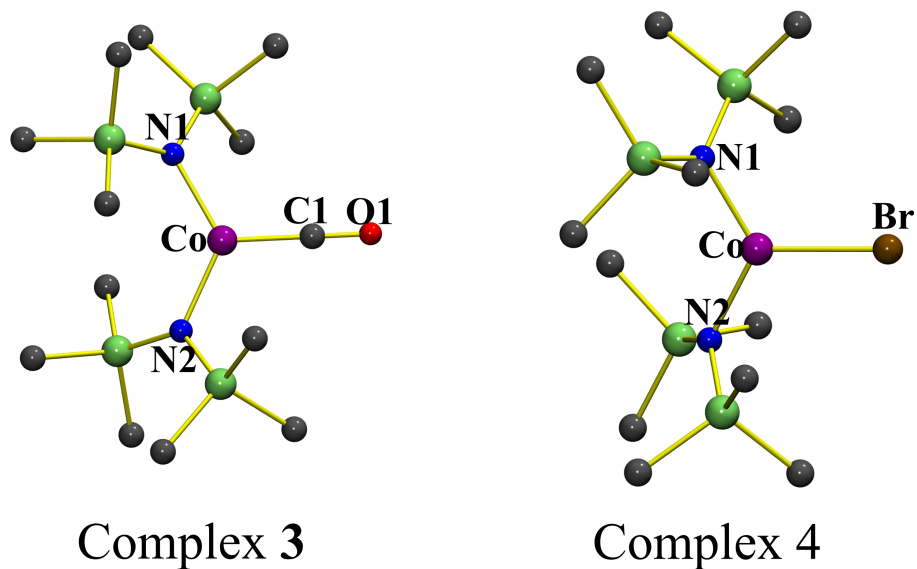

Figure S6: Optimized geometries of complex **3** and **4** at B3LYP/def2-TZVP level with labels on atoms to show structural parameters.

Table S8: Compared structural parameters of complex **3** between the experimentally reported X-Ray crystal structure and optimized geometry.

| Parameters               | Exp geom. | Opt geom. | Deviation(%) |
|--------------------------|-----------|-----------|--------------|
| Bond Distance(Å)         |           |           |              |
| <b>Co-N1</b>             | 1.951     | 1.981     | -1.54        |
| <b>Co-N2</b>             | 1.952     | 1.983     | -1.59        |
| <b>Co-C1</b>             | 1.760     | 1.786     | -1.48        |
| <b>C1-O1</b>             | 1.167     | 1.156     | 0.94         |
| Bond Angle(°)            |           |           |              |
| $\angle$ <b>N1-Co-C1</b> | 115.39    | 117.11    | -1.49        |
| $\angle$ <b>N2-Co-C1</b> | 114.11    | 117.03    | -2.56        |
| $\angle$ <b>N1-Co-N2</b> | 130.50    | 125.85    | 3.56         |

Table S9: Compared structural parameters of complex **4** between the experimentally reported X-Ray crystal structure and optimized geometry.

| Parameters               | Exp geom. | Opt geom. | Deviation(%) |
|--------------------------|-----------|-----------|--------------|
| Bond Distance(Å)         |           |           |              |
| <b>Co-N1</b>             | 1.924     | 1.945     | -1.09        |
| <b>Co-N2</b>             | 1.924     | 1.945     | -1.09        |
| <b>Co-Br</b>             | 2.417     | 2.420     | -0.12        |
| Bond Angle(°)            |           |           |              |
| $\angle$ <b>N1-Co-N2</b> | 129.15    | 122.05    | 5.50         |

## 8 Spin-vibrational coupling

The infrared (IR) spectrum of all of the complexes are depicted in Figure S7 - S10. No imaginary frequency has been observed for any of the complex which confirms the energy minima and thermal stabilization of individual complexes. Table S10 illustrates the harmonic vibrational modes of complex **1** computed from optimized geometry using DFT.

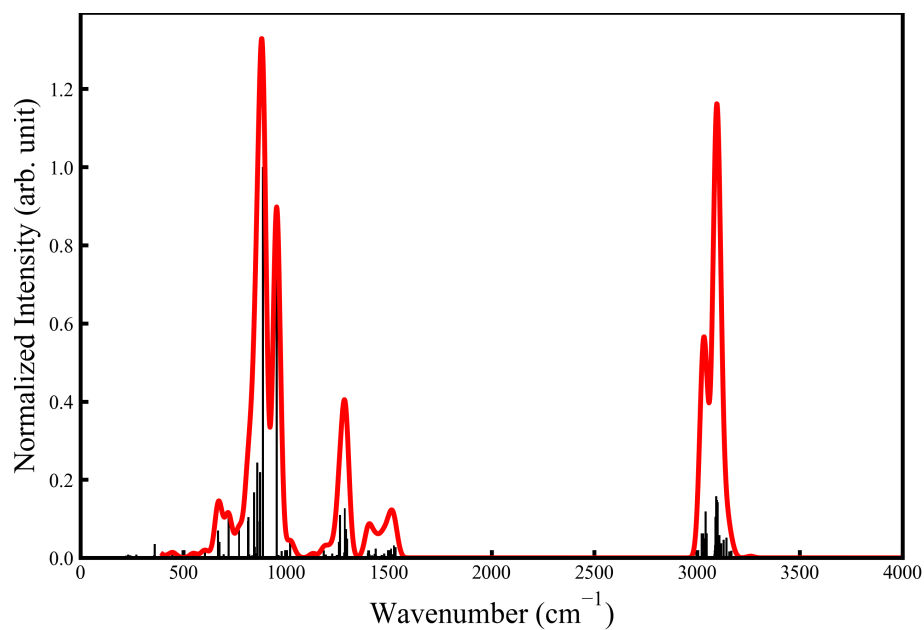

Figure S7: IR spectrum of complex **1** obtained from DFT optimized geometry.

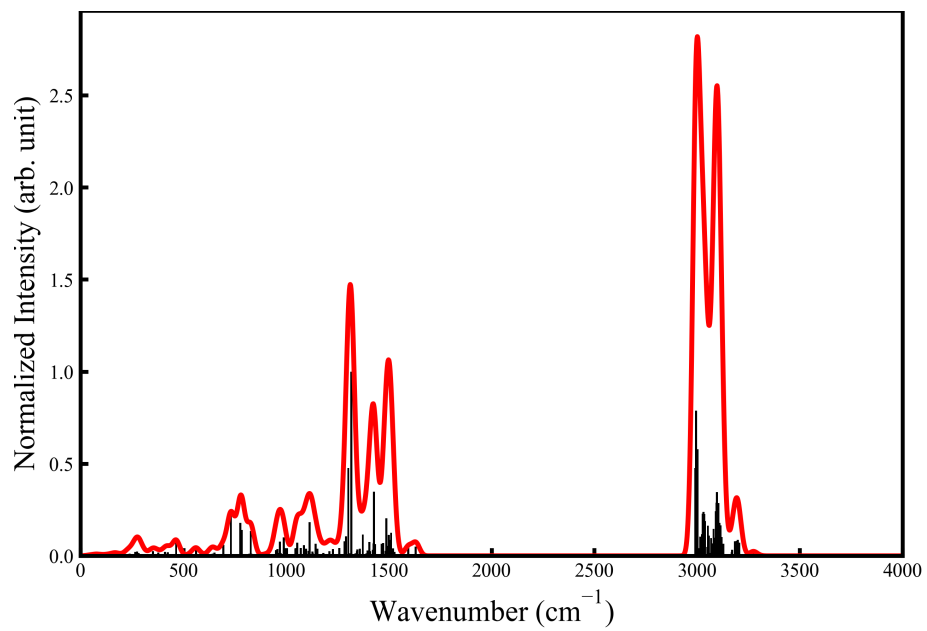

Figure S8: IR spectrum of complex **2** obtained from DFT optimized geometry.

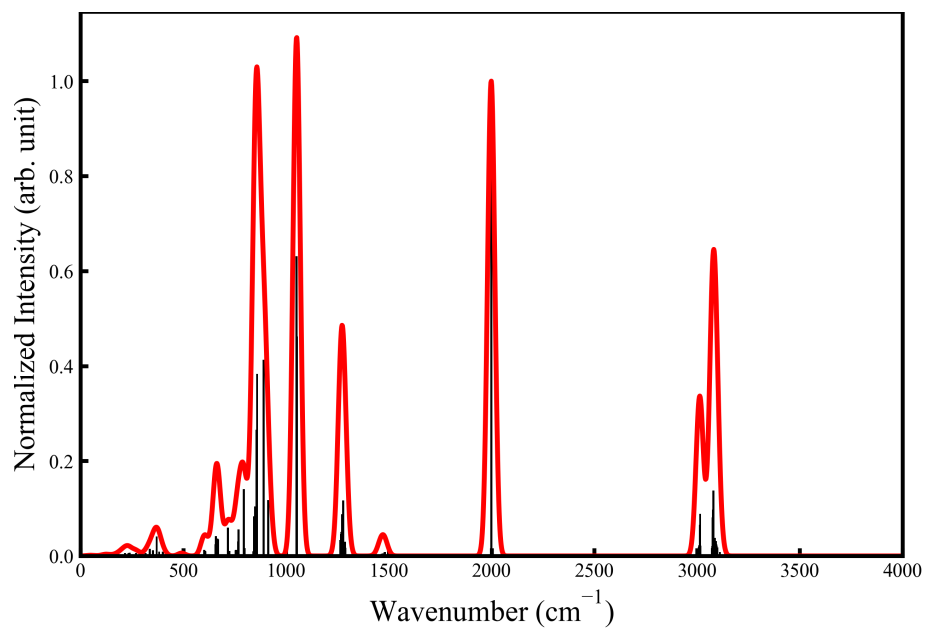

Figure S9: IR spectrum of complex **3** obtained from DFT optimized geometry.

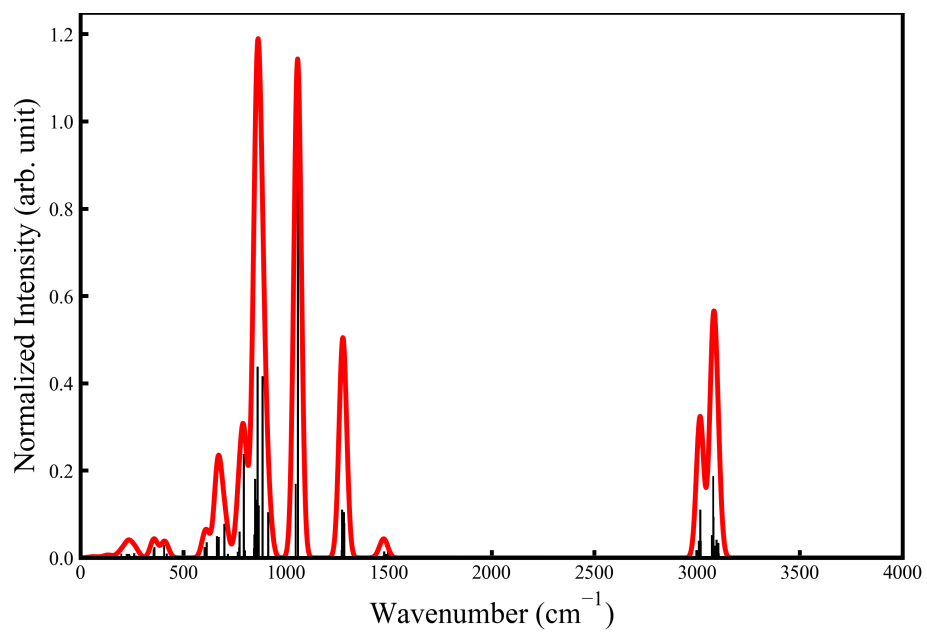

Figure S10: IR spectrum of complex **4** obtained from DFT optimized geometry.

Table S10: Computed vibrational frequencies ' $\nu$ ', reduced masses ' $\mu$ ', first derivatives (" $g'_z$ ") of  $g_z$ ,  $D$  and  $E$  parameters and second derivatives (" $g''_z$ ") of  $g_z$  with respect to the vibrational coordinate  $Q_k$  of the first 46 vibrational modes of complex **1** (a.m.u. = atomic mass unit).

|                            | $\nu_1$    | $\nu_2$    | $\nu_3$    | $\nu_4$    | $\nu_5$    |
|----------------------------|------------|------------|------------|------------|------------|
| $\nu$ (cm <sup>-1</sup> )  | 17.7078    | 27.9697    | 29.0275    | 45.7053    | 52.1089    |
| $\mu$ (a.m.u.)             | 2.7519     | 3.2701     | 3.4115     | 3.3309     | 3.4937     |
| $g'_z$ (Å <sup>-1</sup> )  | 0.000942   | 0.002525   | 0.00251    | 0.009325   | -0.003077  |
| $g''_z$ (Å <sup>-2</sup> ) | -0.000498  | 0.001563   | -0.000412  | 0.00934    | 0.001573   |
| $(\delta D/\delta Q_k)_0$  | -0.098262  | -0.334370  | -0.119157  | -0.51078   | 0.309717   |
| $(\delta E/\delta Q_k)_0$  | 0.027156   | 0.032212   | -0.036508  | -0.05963   | -0.297562  |
|                            | $\nu_6$    | $\nu_7$    | $\nu_8$    | $\nu_9$    | $\nu_{10}$ |
| $\nu$ (cm <sup>-1</sup> )  | 56.6234    | 61.7129    | 70.2899    | 82.5776    | 92.0062    |
| $\mu$ (a.m.u.)             | 3.2227     | 3.0765     | 4.2783     | 3.5018     | 3.3515     |
| $g'_z$ (Å <sup>-1</sup> )  | 0.00903    | -0.00086   | 0.0065525  | 0.00178    | -0.02167   |
| $g''_z$ (Å <sup>-2</sup> ) | -0.002059  | 0.00487    | -0.033456  | 0.00269    | -0.085813  |
| $(\delta D/\delta Q_k)_0$  | -0.533982  | 0.261542   | -0.213332  | -0.119157  | 3.321987   |
| $(\delta E/\delta Q_k)_0$  | 0.012305   | -0.062531  | -0.192938  | -0.075716  | -1.332535  |
|                            | $\nu_{11}$ | $\nu_{12}$ | $\nu_{13}$ | $\nu_{14}$ | $\nu_{15}$ |
| $\nu$ (cm <sup>-1</sup> )  | 112.1214   | 115.9576   | 122.6828   | 134.9234   | 140.1331   |
| $\mu$ (a.m.u.)             | 2.9803     | 3.9727     | 2.5997     | 2.6883     | 1.5332     |
| $g'_z$ (Å <sup>-1</sup> )  | 0.0088175  | 0.04527    | 0.0148175  | -0.06489   | -0.0135525 |
| $g''_z$ (Å <sup>-2</sup> ) | -0.003098  | 0.214009   | -0.020919  | -0.057406  | 0.083349   |
| $(\delta D/\delta Q_k)_0$  | -1.072765  | -2.697582  | -1.579267  | 6.89116    | 2.301825   |
| $(\delta E/\delta Q_k)_0$  | 0.312862   | 0.150016   | 0.356403   | -1.733800  | -0.828653  |

|                            |            |            |            |            |            |
|----------------------------|------------|------------|------------|------------|------------|
|                            | $\nu_{16}$ | $\nu_{17}$ | $\nu_{18}$ | $\nu_{19}$ | $\nu_{20}$ |
| $\nu$ (cm <sup>-1</sup> )  | 143.4038   | 151.2529   | 157.8914   | 165.3454   | 170.4254   |
| $\mu$ (a.m.u.)             | 2.9771     | 1.1489     | 1.126      | 1.2955     | 1.625      |
| $g'_z$ (Å <sup>-1</sup> )  | 0.053215   | -0.0045875 | 0.0019425  | -0.008685  | 0.00344    |
| $g''_z$ (Å <sup>-2</sup> ) | 0.325364   | 0.001734   | 0.009024   | 0.016608   | -0.005617  |
| $(\delta D/\delta Q_k)_0$  | -3.374887  | -0.12833   | -0.627205  | -0.575702  | 0.125035   |
| $(\delta E/\delta Q_k)_0$  | 0.070884   | -0.076813  | 0.334109   | 0.040067   | 0.369580   |
|                            | $\nu_{21}$ | $\nu_{22}$ | $\nu_{23}$ | $\nu_{24}$ | $\nu_{25}$ |
| $\nu$ (cm <sup>-1</sup> )  | 172.5493   | 176.8872   | 181.881    | 186.3746   | 187.6951   |
| $\mu$ (a.m.u.)             | 1.5300     | 2.0071     | 1.9397     | 1.5689     | 1.6531     |
| $g'_z$ (Å <sup>-1</sup> )  | -0.0148275 | -0.0328725 | 0.012345   | -0.002255  | 0.0190275  |
| $g''_z$ (Å <sup>-2</sup> ) | -0.015006  | -0.109683  | -0.049929  | -0.00237   | -0.093407  |
| $(\delta D/\delta Q_k)_0$  | 1.786002   | 3.40924    | -0.143895  | 0.218215   | -3.049337  |
| $(\delta E/\delta Q_k)_0$  | -0.404783  | -1.431032  | 0.110691   | -0.001587  | 1.300551   |
|                            | $\nu_{26}$ | $\nu_{27}$ | $\nu_{28}$ | $\nu_{29}$ | $\nu_{30}$ |
| $\nu$ (cm <sup>-1</sup> )  | 198.5829   | 200.0706   | 210.8822   | 214.1692   | 222.4422   |
| $\mu$ (a.m.u.)             | 1.8132     | 2.0228     | 2.0991     | 2.6898     | 2.0715     |
| $g'_z$ (Å <sup>-1</sup> )  | 0.026975   | 0.0098225  | -0.0348625 | 0.03681    | -0.005395  |
| $g''_z$ (Å <sup>-2</sup> ) | -0.188313  | -0.001117  | -0.224401  | -0.712945  | -0.033976  |
| $(\delta D/\delta Q_k)_0$  | -3.854717  | -0.250955  | 2.200245   | -3.567312  | -1.256762  |
| $(\delta E/\delta Q_k)_0$  | 1.427049   | 0.26141    | -0.518104  | 0.409940   | -0.509910  |



|                            | $\nu_{31}$ | $\nu_{32}$ | $\nu_{33}$ | $\nu_{34}$ | $\nu_{35}$ |
|----------------------------|------------|------------|------------|------------|------------|
| $\nu$ (cm <sup>-1</sup> )  | 226.965    | 232.3852   | 232.8981   | 242.3816   | 247.4172   |
| $\mu$ (a.m.u.)             | 1.2969     | 1.1886     | 1.8649     | 2.3392     | 2.4567     |
| $g'_z$ (Å <sup>-1</sup> )  | 0.005855   | 0.0083625  | -0.009095  | 0.00191    | 0.001135   |
| $g''_z$ (Å <sup>-2</sup> ) | -0.001231  | -0.007138  | -0.022787  | 0.004409   | -0.003676  |
| $(\delta D/\delta Q_k)_0$  | -1.19693   | -0.439535  | 2.11009    | 0.306105   | -0.144857  |
| $(\delta E/\delta Q_k)_0$  | 0.176023   | 0.349997   | -0.036094  | -0.082132  | 0.104669   |
|                            | $\nu_{36}$ | $\nu_{37}$ | $\nu_{38}$ | $\nu_{39}$ | $\nu_{40}$ |
| $\nu$ (cm <sup>-1</sup> )  | 250.7239   | 258.6549   | 261.2712   | 270.1569   | 272.0413   |
| $\mu$ (a.m.u.)             | 2.0499     | 1.2556     | 2.3972     | 1.4884     | 2.7004     |
| $g'_z$ (Å <sup>-1</sup> )  | -0.0022975 | 0.006495   | 0.0038775  | -0.0047575 | -0.028225  |
| $g''_z$ (Å <sup>-2</sup> ) | -0.021417  | -0.002012  | -0.006915  | -0.009346  | 0.084374   |
| $(\delta D/\delta Q_k)_0$  | 0.986342   | -0.929082  | -0.396645  | 0.420500   | 2.070535   |
| $(\delta E/\delta Q_k)_0$  | -0.267088  | 0.248803   | -0.018568  | -0.149088  | -0.149305  |
|                            | $\nu_{41}$ | $\nu_{42}$ | $\nu_{43}$ | $\nu_{44}$ | $\nu_{45}$ |
| $\nu$ (cm <sup>-1</sup> )  | 282.1781   | 284.6322   | 287.3400   | 296.7691   | 307.829    |
| $\mu$ (a.m.u.)             | 1.3158     | 1.3034     | 1.5159     | 1.4370     | 1.8165     |
| $g'_z$ (Å <sup>-1</sup> )  | 0.0064225  | -0.005625  | -0.0036325 | 0.00318    | -0.01294   |
| $g''_z$ (Å <sup>-2</sup> ) | -0.001402  | -0.00192   | -0.013758  | -0.014766  | -0.045631  |
| $(\delta D/\delta Q_k)_0$  | -1.166592  | 1.27274    | -0.431682  | -1.064952  | 1.6214475  |
| $(\delta E/\delta Q_k)_0$  | 0.261293   | -0.324777  | -0.045219  | -0.118031  | -0.313112  |

---

| $\nu_{46}$                 |            |
|----------------------------|------------|
| $\nu$ (cm <sup>-1</sup> )  | 319.5684   |
| $\mu$ (a.m.u.)             | 1.5052     |
| $g'_z$ (Å <sup>-1</sup> )  | -0.0023625 |
| $g''_z$ (Å <sup>-2</sup> ) | -0.117904  |
| $(\delta D/\delta Q_k)_0$  | -0.2884175 |
| $(\delta E/\delta Q_k)_0$  | -0.0278151 |

---

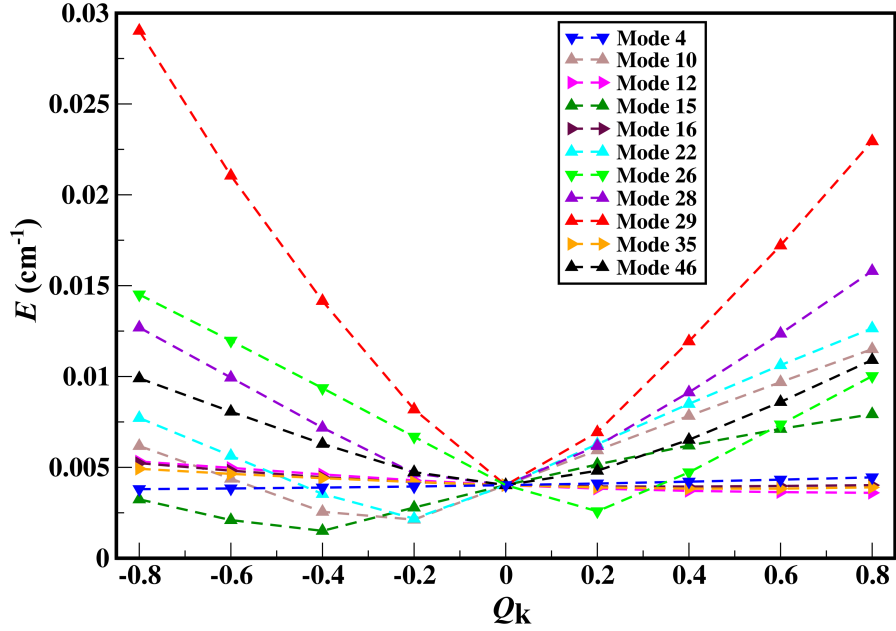

Figure S11: Variation of  $E$  value with respect to the distortion parameter  $Q_k$ , for few specific modes of complex **1**.

In the first approach quantifying spin-vibrational coupling, mode 10 ( $\nu_{10} = 92.01$  cm<sup>-1</sup>) possesses  $C_k$  ( $-4 \times 10^3$ ) approximately one-third of mode 16 ( $\nu_{16} = 143.40$  cm<sup>-1</sup> and  $C_k = 12 \times 10^3$ ) in magnitude but mode 16 substantially becomes populated with rise in temperature. The modes with even marginal coupling may get highly populated with temperature and contribute equally as of high frequency modes having larger coupling constants. Here,

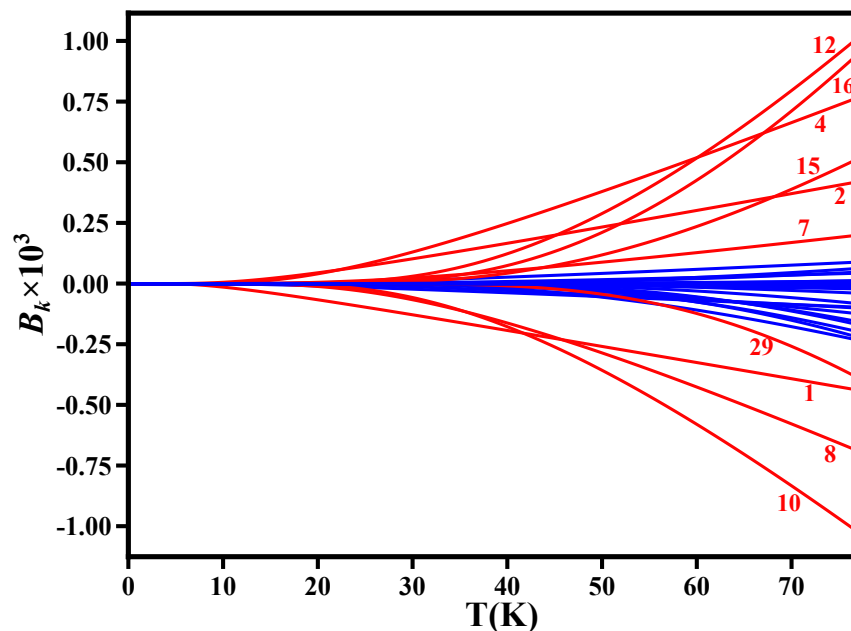

Figure S12: Computed  $B_k$  values corresponding to individual vibrational mode ( $k$ ) at CASSCF level for complex **1**. The number corresponding to each red line represents the index of the normal mode ( $k$ ).

modes 4 and 10 do not have significantly larger coupling constants but are noticed to be populated already from low temperature and hence are assumed to contribute largely. Apart from this, the high energy vibrational modes with the large spin-vibrational coupling constants are found to be inactive towards relaxing the spin for a ferrocenium complex, due to their minor population at low temperature.<sup>9</sup> The high frequency modes 12 and 16 ( $\nu_{12} = 115.96 \text{ cm}^{-1}$  and  $\nu_{16} = 143.40 \text{ cm}^{-1}$ ) are found to have larger coupling constants and get more populated only at elevated temperature. The  $g_z$  value for modes having positive coupling is found to be enhanced from the mentioned value at 0 K temperature, though it falls with elevation in temperature for modes with negative coupling constants (Table S10).

Table S11: Coordinates of geometry optimized using DFT at B3LYP/def2-TZVP level for complex **1**.

---

|    |                  |                  |                  |
|----|------------------|------------------|------------------|
| Co | 12.7433767082279 | 7.59911395894227 | 8.14671929638309 |
| Si | 12.9984292943676 | 8.88980809687316 | 5.37197108542534 |
| Si | 11.6813503232952 | 6.11934707875846 | 5.6656979130776  |
| N  | 12.4174960139728 | 7.54912667676661 | 6.29660513659477 |
| C  | 13.9366273475569 | 8.23641890140981 | 9.88960927911504 |
| C  | 12.7629668674258 | 9.05481456190764 | 9.83283637106648 |
| H  | 12.7638467881433 | 10.1159243739677 | 9.6665721128887  |
| C  | 13.4702196504412 | 6.87656452610034 | 10.123996491811  |
| C  | 12.0468423414223 | 6.94570776634837 | 10.1825326960185 |
| H  | 11.3972662991302 | 6.09964998208426 | 10.3171178356397 |
| C  | 11.6025523042028 | 8.27562677502674 | 10.0133327702884 |
| C  | 15.3208650505403 | 8.89784831161453 | 9.89803513122943 |
| C  | 14.2043724529635 | 5.54206482607049 | 10.3262673844718 |
| C  | 16.4254059322341 | 8.09981541121581 | 9.19282047156639 |
| H  | 16.6654990867115 | 7.16794282544348 | 9.69422967797244 |
| H  | 17.3398793510685 | 8.69564123939359 | 9.16691087628579 |
| H  | 16.1484312312393 | 7.87307588990742 | 8.16222894236983 |
| C  | 15.267174088651  | 10.2637040133977 | 9.18407926456032 |
| H  | 14.9310694477254 | 10.1657442563056 | 8.15187587031086 |
| H  | 16.2670418493229 | 10.7002291807068 | 9.16974134558518 |
| H  | 14.6147762010474 | 10.9723379858513 | 9.69271883242071 |
| C  | 10.1630311231289 | 8.74629346994737 | 10.0331601921985 |
| C  | 13.2002093276994 | 4.43801986063403 | 10.7091875615141 |
| H  | 12.6683697776016 | 4.6779175655337  | 11.6312743108899 |
| H  | 13.7414877845794 | 3.50416246425301 | 10.8691513316683 |

|   |                  |                  |                  |
|---|------------------|------------------|------------------|
| H | 12.4661784909746 | 4.25992837483891 | 9.92297192093213 |
| C | 15.7250342408134 | 9.16756132107533 | 11.3624157672262 |
| H | 14.9831472454961 | 9.80337640046628 | 11.848742781417  |
| H | 16.6895426909165 | 9.68042546180834 | 11.3991520557242 |
| H | 15.807020915231  | 8.24983482555735 | 11.9407126866606 |
| C | 12.5095359355092 | 10.5150009309013 | 6.18729088698072 |
| H | 11.4208832444209 | 10.5958922021089 | 6.24010521833714 |
| H | 12.8799266635847 | 11.3650787881858 | 5.607802719422   |
| H | 12.8976312768058 | 10.6096318611533 | 7.20197571200288 |
| C | 15.207707003343  | 5.62944128706012 | 11.488858108635  |
| H | 16.0378966790376 | 6.29754639917015 | 11.2814114708924 |
| H | 15.6253063436821 | 4.6405776608344  | 11.6911457708911 |
| H | 14.712323096483  | 5.97936663494649 | 12.3965303836872 |
| C | 12.3017621144616 | 8.95702090478348 | 3.62210869108711 |
| H | 12.492551334964  | 8.04565020569258 | 3.05277698300344 |
| H | 12.7708372033901 | 9.78449432684427 | 3.0823651991522  |
| H | 11.2246378044577 | 9.13371186957598 | 3.62478397393163 |
| C | 14.9093075293822 | 5.06195303203711 | 9.04353483177833 |
| H | 14.1833565461148 | 4.91016037434534 | 8.24369814613611 |
| H | 15.4080840769838 | 4.10703525198946 | 9.22689633130573 |
| H | 15.6537278337318 | 5.76344615334798 | 8.68318172692966 |
| C | 12.8444257236893 | 5.22904934501152 | 4.48210431504878 |
| H | 13.1159955706754 | 5.85403983715834 | 3.62898447446318 |
| H | 12.3884258314216 | 4.31505612856241 | 4.09175080013174 |
| H | 13.7689620528825 | 4.95041364139388 | 4.99428517374646 |
| C | 11.253773648305  | 4.90002082135137 | 7.03979369289442 |
| H | 12.1347812664412 | 4.54538215823671 | 7.5770837551197  |

|   |                  |                  |                  |
|---|------------------|------------------|------------------|
| H | 10.7648172335187 | 4.02380182408627 | 6.60414229575625 |
| H | 10.5642087702704 | 5.33073246629342 | 7.76827868632387 |
| C | 14.8737522396775 | 8.81212377453464 | 5.22452691929061 |
| H | 15.3521467663779 | 8.83708541458258 | 6.20581874566752 |
| H | 15.2696090699703 | 9.64577939960686 | 4.63834322074167 |
| H | 15.1765186952088 | 7.88213441026224 | 4.73648211102765 |
| C | 10.0608242181562 | 6.49074574808198 | 4.78155476480344 |
| H | 9.3881236480748  | 7.05367056933694 | 5.43375603103204 |
| H | 9.55577997732142 | 5.56125674767188 | 4.50415593192126 |
| H | 10.2090026827824 | 7.07313090053552 | 3.8721061396977  |
| C | 9.31068005926707 | 7.90780917787995 | 9.0657977930941  |
| H | 9.66876371041298 | 8.01467041251321 | 8.04023932090196 |
| H | 8.26795576836058 | 8.23135950332669 | 9.10053447636256 |
| H | 9.33999979262896 | 6.84835291048893 | 9.32436980300044 |
| C | 9.61879328455603 | 8.57755413334096 | 11.4644067852525 |
| H | 9.65652763269578 | 7.53240383094889 | 11.7758334083445 |
| H | 8.58050575945171 | 8.9133015927971  | 11.5217376902933 |
| H | 10.20792667614   | 9.16154354427793 | 12.1739988367992 |
| C | 10.0632789727211 | 10.2210692195264 | 9.62736250041411 |
| H | 10.6121535177517 | 10.8635129672081 | 10.3184901742973 |
| H | 9.01921079064449 | 10.53958630078   | 9.63582536696166 |
| H | 10.457341718112  | 10.3842389550214 | 8.62302316912626 |

---

Table S12: Coordinates of geometry optimized using DFT at B3LYP/def2-TZVP level for complex **2**.

---

|    |                   |                  |                   |
|----|-------------------|------------------|-------------------|
| Co | 2.70706528584774  | 12.9075825542725 | 4.34687344574799  |
| C  | 0.88979340574327  | 12.859964456601  | 3.6922748873665   |
| C  | -1.3405503410551  | 12.5734351981382 | 3.29283402825267  |
| H  | -2.34599755091858 | 12.2711282127705 | 3.51778715412151  |
| C  | -0.80844995931977 | 13.1182878270654 | 2.17988080534652  |
| H  | -1.25466070940005 | 13.3909073972898 | 1.24089873216799  |
| C  | 1.51732464898947  | 13.7676955951944 | 1.50232954734682  |
| C  | 2.31276640638906  | 12.8292382464951 | 0.8335118345312   |
| C  | 3.32010728460342  | 13.315154878692  | 0.00133055875152  |
| H  | 3.9626447022137   | 12.6184600912788 | -0.52126751580698 |
| C  | 3.5091704642976   | 14.6777884572508 | -0.16481535572039 |
| H  | 4.30163598170536  | 15.0374183000979 | -0.80919904334565 |
| C  | 2.68136432173971  | 15.5856403797221 | 0.48158514934511  |
| H  | 2.83567696876483  | 16.6450153878769 | 0.33056384838152  |
| C  | 1.66498840895531  | 15.1505314040625 | 1.3281296546539   |
| C  | 2.09486254027568  | 11.3343061439536 | 0.98267699232023  |
| H  | 1.22438390440308  | 11.186166873973  | 1.62018082843126  |
| C  | 1.78429132144749  | 10.6777870332664 | -0.36767513177108 |
| H  | 0.92240241334787  | 11.1467414748325 | -0.84609087909579 |
| H  | 1.5626893765531   | 9.61742003003006 | -0.22876470335476 |
| H  | 2.62998345026988  | 10.7526435372403 | -1.05427003513273 |
| C  | 3.28347826917708  | 10.6567925471815 | 1.67212392010599  |
| H  | 4.1938133106529   | 10.7475356346103 | 1.07604774560103  |
| H  | 3.08152481596864  | 9.59434395944525 | 1.8246757573453   |
| H  | 3.47791672788489  | 11.113004194804  | 2.64523570787452  |

|   |                   |                  |                  |
|---|-------------------|------------------|------------------|
| C | 0.77916192731597  | 16.1328168265449 | 2.07414684614345 |
| H | -0.1638293327224  | 15.6278261214901 | 2.28912330089504 |
| C | 0.44373625891635  | 17.3819751640328 | 1.25530908908939 |
| H | 1.32251272625856  | 18.0095507637237 | 1.09502304646581 |
| H | -0.29176097019625 | 17.9872402303493 | 1.7887018280766  |
| H | 0.02989227907677  | 17.124218590561  | 0.27853935269282 |
| C | 1.40856790531607  | 16.5100218333321 | 3.42145255255849 |
| H | 1.63466160111358  | 15.6238258802751 | 4.01356016183176 |
| H | 0.73294997874411  | 17.1502461766834 | 3.9935765671792  |
| H | 2.34132978530961  | 17.055800027294  | 3.26423961219608 |
| C | -0.45843525462203 | 11.8008182711753 | 5.48780606172542 |
| C | -0.08157503989861 | 10.4567160017709 | 5.64241398734569 |
| C | -0.29528346611772 | 9.87118944022487 | 6.88709596908724 |
| H | -0.01100361445877 | 8.84123208745915 | 7.04817695085618 |
| C | -0.86663178480457 | 10.5891646337987 | 7.929215215238   |
| H | -1.02419635570926 | 10.1121389982158 | 8.88845188978511 |
| C | -1.22048616809352 | 11.9152393487845 | 7.75122404545543 |
| H | -1.64828915518565 | 12.4686935970501 | 8.57608526944527 |
| C | -1.01548160996839 | 12.5527165097934 | 6.52782485660505 |
| C | 0.50631752673385  | 9.66377920661182 | 4.48688450910704 |
| H | 1.15422580203077  | 10.3458491527622 | 3.93471644137157 |
| C | -0.5966106387374  | 9.17125412688252 | 3.53664965303097 |
| H | -1.27542662212127 | 8.49421374988252 | 4.0609382166139  |
| H | -0.15778769673568 | 8.6267041567254  | 2.69726301002294 |
| H | -1.18381465949937 | 9.99320872617301 | 3.13060031536245 |
| C | 1.37099077735953  | 8.48238672513361 | 4.92790266803544 |
| H | 2.12937513129492  | 8.7840922866134  | 5.64816636449243 |



|   |                   |                  |                  |
|---|-------------------|------------------|------------------|
| H | 1.88108037413277  | 8.06021187612213 | 4.06015847327142 |
| H | 0.77170113187941  | 7.68380097981576 | 5.37120084011232 |
| C | -1.40735365945511 | 14.007558244558  | 6.33935828327836 |
| H | -0.87743248549286 | 14.3780418522337 | 5.46094478080764 |
| C | -2.91537124653673 | 14.1397155206228 | 6.07857001168049 |
| H | -3.22848042445555 | 13.5613152225302 | 5.20957324286902 |
| H | -3.18437174141666 | 15.1839480758627 | 5.90451107129185 |
| H | -3.48444362464849 | 13.7818518464323 | 6.93971801265055 |
| C | -1.00086459175099 | 14.8904240856494 | 7.52339883093941 |
| H | -1.57943702703323 | 14.658069803318  | 8.41955183176107 |
| H | -1.17941589319551 | 15.9402273069835 | 7.28292754502415 |
| H | 0.05441967843446  | 14.7730405256238 | 7.76426409584931 |
| C | 4.12347882712134  | 12.0326669289945 | 5.78218913020279 |
| C | 4.80844974620679  | 12.7821837154914 | 4.76913560194468 |
| C | 4.42713835053101  | 14.1495853902583 | 4.91247049100649 |
| C | 3.51294302533045  | 14.2476882436125 | 6.00037244317724 |
| C | 3.32144106857555  | 12.9340833062622 | 6.52938067892146 |
| C | 4.33365294814862  | 10.5833723757251 | 6.08896634123854 |
| H | 5.24590990293027  | 10.426575532123  | 6.67681516827095 |
| H | 4.42940412103743  | 9.97825961359421 | 5.18463410550194 |
| H | 3.50413282534746  | 10.1807822838393 | 6.67117848781899 |
| C | 5.87048239578045  | 12.2630822514314 | 3.84943351467807 |
| H | 5.88018664183583  | 12.8023103952716 | 2.89977142831686 |
| H | 5.72650113561084  | 11.2051638752504 | 3.62241136967206 |
| H | 6.87015108508309  | 12.3628830537773 | 4.28922435148627 |
| C | 4.97065357635427  | 15.2767199546256 | 4.08836513957141 |
| H | 4.36598039027814  | 16.1770997207215 | 4.1918184052654  |

|   |                   |                  |                  |
|---|-------------------|------------------|------------------|
| H | 4.99844310924451  | 15.0239414286509 | 3.02594279708949 |
| H | 5.9926855023698   | 15.5352479507136 | 4.38750576163919 |
| C | 2.94613530108418  | 15.5077039004032 | 6.57568257531529 |
| H | 3.45669629299433  | 15.7918531633629 | 7.50322829373286 |
| H | 1.884935170934    | 15.4121003231781 | 6.81066310056583 |
| H | 3.04761829424507  | 16.3449738866352 | 5.88544676871435 |
| C | 2.4846671843118   | 12.5829128178326 | 7.71832018861216 |
| H | 1.99801989676835  | 11.6142115168687 | 7.60092731462644 |
| H | 1.69592541881149  | 13.3166128203058 | 7.87837612525935 |
| H | 3.08082259985004  | 12.5432058701898 | 8.63792199805394 |
| N | -0.30016034871599 | 12.4159401012018 | 4.2022867387088  |
| N | 0.54355043233337  | 13.2879299134368 | 2.43566792089986 |

---

Table S13: Coordinates of geometry optimized using DFT at B3LYP/def2-TZVP level for complex **3**.

|    |                   |                   |                  |
|----|-------------------|-------------------|------------------|
| Co | 1.21091375093287  | -2.86949591277165 | 11.0136909846219 |
| Si | -1.30723007466658 | -1.73171492145975 | 12.4980122993179 |
| Si | 2.24835719725639  | -4.38018324854133 | 13.5709071419929 |
| Si | 4.00321248598059  | -2.26850799784282 | 12.2719238553861 |
| Si | -1.6952583595785  | -3.55170534527467 | 10.0947603081124 |
| O  | 2.21525566866999  | -2.60869870816423 | 8.25966172293688 |
| N  | 2.55908017190827  | -3.14772282444548 | 12.4411116902116 |
| N  | -0.75138004616974 | -2.77144300553357 | 11.2733548291985 |
| C  | 1.82038629845502  | -2.70430702198963 | 9.34208199199215 |
| C  | 3.71525024012092  | -0.53495502469421 | 11.5767256889936 |
| H  | 3.28140040887387  | -0.57211159341182 | 10.5756366872518 |

|   |                   |                   |                  |
|---|-------------------|-------------------|------------------|
| H | 4.65614857070952  | 0.02180455594654  | 11.5180543444463 |
| H | 3.02788875203642  | 0.02532728431112  | 12.2147504173082 |
| C | -2.60713206593247 | -0.49468999407274 | 11.8757511282033 |
| H | -2.19004786870844 | 0.11825751289248  | 11.0722668184305 |
| H | -2.92809291817719 | 0.1756968605242   | 12.6793496486911 |
| H | -3.49639359831632 | -0.9929487333786  | 11.4828496557473 |
| C | 0.07486777610773  | -0.67920442744199 | 13.2321767234302 |
| H | 0.89508680320362  | -1.29290398605691 | 13.6057124570471 |
| H | -0.3089286004222  | -0.06917075346579 | 14.0563300222049 |
| H | 0.49166707993516  | -0.00516141808822 | 12.4794449493085 |
| C | 3.70508749479826  | -5.58289152643412 | 13.7628270504681 |
| H | 3.94327888652018  | -6.04154933914556 | 12.7993907952084 |
| H | 3.46250457009731  | -6.38543943635558 | 14.4666872715128 |
| H | 4.60800830072074  | -5.0857738864577  | 14.1241870140085 |
| C | 1.88366862863804  | -3.70724429563247 | 15.3045097741891 |
| H | 2.72461414802922  | -3.1203825600459  | 15.68155870806   |
| H | 1.69153266445889  | -4.51668010865091 | 16.0159384721438 |
| H | 1.00625238703497  | -3.05646156315044 | 15.29079139056   |
| C | -0.90818646129868 | -5.15950461972253 | 9.49013777887017 |
| H | 0.05498290824539  | -4.97768156258951 | 9.00893442351264 |
| H | -1.55796805455951 | -5.66290982170554 | 8.76697311780892 |
| H | -0.73697530576567 | -5.84150516849852 | 10.3259952883462 |
| C | -2.10333968909166 | -2.66954416773797 | 13.9396045192106 |
| H | -2.95054998928594 | -3.26767743267223 | 13.5961766332689 |
| H | -2.46268919858811 | -1.98750659470538 | 14.716561998785  |
| H | -1.38219387431015 | -3.35090861535921 | 14.3973006846846 |
| C | 0.77609025461378  | -5.45092383129957 | 13.0795009409442 |

|   |                   |                   |                  |
|---|-------------------|-------------------|------------------|
| H | -0.11742441470781 | -4.85068414639319 | 12.9054836432942 |
| H | 0.55899942812059  | -6.18465379877312 | 13.8624312020514 |
| H | 0.98551418768752  | -5.99576499379995 | 12.1554032208294 |
| C | 5.23533497409771  | -3.1246518768237  | 11.1186667682474 |
| H | 5.48965585143302  | -4.1176106177319  | 11.4985601475704 |
| H | 6.16288060036829  | -2.55330642525565 | 11.0118543871669 |
| H | 4.79882124641181  | -3.25190263861774 | 10.1251185609695 |
| C | -1.97944597314749 | -2.47073350706178 | 8.56724190532733 |
| H | -2.49850061535925 | -1.54787749595623 | 8.83871778691989 |
| H | -2.57508131839414 | -2.98492967379744 | 7.80624598017724 |
| H | -1.02264506051175 | -2.19296086476478 | 8.11830240437753 |
| C | -3.41130181112239 | -4.05726907421274 | 10.7329406561511 |
| H | -3.3193058652119  | -4.76234963086901 | 11.5631959385064 |
| H | -3.98675026919993 | -4.54623136425335 | 9.94066040172474 |
| H | -3.99313616365436 | -3.20326798624474 | 11.0863506392262 |
| C | 4.90460324664848  | -1.98635524600054 | 13.9199330755188 |
| H | 4.27665292964259  | -1.41591004820557 | 14.6092383554042 |
| H | 5.82631524189706  | -1.41832219320263 | 13.7598509119843 |
| H | 5.17320144252588  | -2.92248118491344 | 14.4138747881372 |

---

Table S14: Coordinates of geometry optimized using DFT at B3LYP/def2-TZVP level for complex 4.

---

|    |                  |                  |                   |
|----|------------------|------------------|-------------------|
| Co | 12.5868694885045 | 8.0033485047776  | 2.86127734952549  |
| Br | 15.0068744048707 | 8.0032852085537  | 2.86132623640064  |
| N  | 11.6445817453654 | 7.75877605949622 | 1.17718545567208  |
| Si | 12.0588658154694 | 6.3407183635721  | 0.3229028526932   |
| Si | 10.8255212015568 | 9.15499581991733 | 0.63887409839807  |
| C  | 13.3624956699604 | 6.67465939477998 | -1.00180459385161 |
| H  | 13.6454722972432 | 5.76742259373078 | -1.54436940393963 |
| H  | 14.2574183496369 | 7.09069910350791 | -0.53277786128102 |
| H  | 12.9977563726371 | 7.40353199209405 | -1.73114121157493 |
| C  | 12.7580360002126 | 5.0382848114546  | 1.49529510533473  |
| H  | 13.0580686039049 | 4.14998867065095 | 0.93087730706163  |
| H  | 12.013420208083  | 4.72569330069917 | 2.23084919439929  |
| H  | 13.6386619056171 | 5.40425109348127 | 2.02788306260033  |
| C  | 10.5815672558361 | 5.5206362701529  | -0.53421153725349 |
| H  | 10.8665632330662 | 4.53927854557987 | -0.92626226245863 |
| H  | 10.2069748034572 | 6.11661128350596 | -1.36772289502373 |
| H  | 9.75899380909678 | 5.37498967742966 | 0.17090983561456  |
| C  | 12.0297100153413 | 10.5820612557131 | 0.35170083126002  |
| H  | 11.5129126290594 | 11.4986769972925 | 0.0507842009858   |
| H  | 12.7398988111219 | 10.3150860666269 | -0.43553783828933 |
| H  | 12.6127712390663 | 10.8022227051176 | 1.24778539842543  |
| C  | 9.90349530188946 | 8.91818941892324 | -0.99864114144632 |
| H  | 9.43996292576153 | 9.86206080595958 | -1.30165546287174 |
| H  | 9.11377884259235 | 8.16938925499312 | -0.91134571198274 |
| H  | 10.575881050946  | 8.60671916816501 | -1.80194740985991 |

|    |                  |                  |                  |
|----|------------------|------------------|------------------|
| C  | 9.53732177478124 | 9.71328305311524 | 1.89907184404804 |
| H  | 9.10451759917333 | 10.6818428819402 | 1.63172152282603 |
| H  | 9.97413007977657 | 9.78723337366665 | 2.89606983435709 |
| H  | 8.72749459426694 | 8.98129391782253 | 1.95845492896983 |
| N  | 11.6445691537458 | 8.24792760398246 | 4.54535885521578 |
| Si | 12.0588632878298 | 9.66598451633013 | 5.39963849349277 |
| Si | 10.8255257894147 | 6.8517018343992  | 5.08368099346941 |
| C  | 13.362480388827  | 9.33204655967395 | 6.72435871915574 |
| H  | 13.645462289682  | 10.2392885584962 | 7.26691216899553 |
| H  | 14.2574015422269 | 8.91599203317247 | 6.25534233576221 |
| H  | 12.9977301595328 | 8.60318804387477 | 7.45370365034556 |
| C  | 12.7580525848056 | 10.9684036738632 | 4.22724060756105 |
| H  | 13.0580929883225 | 11.8567000394526 | 4.79165383203472 |
| H  | 12.0134444936204 | 11.2810000988591 | 3.49168103043982 |
| H  | 13.638677916714  | 10.6024252694824 | 3.6946594122215  |
| C  | 10.5815641783833 | 10.4860845293111 | 6.25673516346917 |
| H  | 10.8665631954202 | 11.4674411371207 | 6.64878651573782 |
| H  | 10.2069604921597 | 9.89011353911015 | 7.09024450553059 |
| H  | 9.75899821038369 | 10.6317346735728 | 5.55160598238231 |
| C  | 12.0297324897035 | 5.42465311476197 | 5.37085758346403 |
| H  | 11.5129474308445 | 4.50803250014519 | 5.6717806019785  |
| H  | 12.7399209218641 | 5.69164099793748 | 6.15809231217336 |
| H  | 12.612793835074  | 5.20449492313819 | 4.47477219993576 |
| C  | 9.90350352841673 | 7.08851457489288 | 6.72119715243775 |
| H  | 9.43997640052887 | 6.14464434049493 | 7.02422277002677 |
| H  | 9.11378341403498 | 7.83731035713952 | 6.63389600936964 |
| H  | 10.5758899330142 | 7.39999634888083 | 7.52449839849024 |

|   |                  |                  |                  |
|---|------------------|------------------|------------------|
| C | 9.53732835385954 | 6.29339565992483 | 3.82348934344064 |
| H | 9.10452897829683 | 5.32483591187215 | 4.09084732378646 |
| H | 9.97413603720377 | 6.21943876556542 | 2.82649128806637 |
| H | 8.72749797779519 | 7.02538080182522 | 3.76410102227707 |

---

## References

- (1) Becke, A. D. A new mixing of Hartree–Fock and local density-functional theories. *J. Chem. Phys.* **1993**, *98*, 1372–1377.
- (2) Neese, F.; Wennmohs, F.; Becker, U.; Riplinger, C. The ORCA quantum chemistry program package. *J. Chem. Phys.* **2020**, *152*, 224108.
- (3) Angeli, C.; Cimiraglia, R.; Malrieu, J.-P. N-electron valence state perturbation theory: a fast implementation of the strongly contracted variant. *Chem. Phys. Lett.* **2001**, *350*, 297–305.
- (4) Khurana, R.; Gupta, S.; Ali, M. E. First-principles investigations of magnetic anisotropy and spin-crossover behavior of Fe (III)–TBP complexes. *J. Phys. Chem. A* **2021**, *125*, 2197–2207.
- (5) Llanos, L.; Aravena, D. Effect of low spin excited states for magnetic anisotropy of transition metal mononuclear single molecule magnets. *Inorganics* **2018**, *6*, 24.
- (6) Peters, M.; Baabe, D.; Maekawa, M.; Bockfeld, D.; Zaretzke, M.-K.; Tamm, M.; Walter, M. D. Pogo-stick iron and cobalt complexes: synthesis, structures, and magnetic properties. *Inorg. Chem* **2019**, *58*, 16475–16486.
- (7) Gupta, S. K.; Rajeshkumar, T.; Rajaraman, G.; Murugavel, R. Is a strong axial crystal-

field the only essential condition for a large magnetic anisotropy barrier? The case of non-Kramers Ho(III) versus Tb(III). *Dalton Trans.* **2018**, *47*, 357–366.

- (8) Ruamps, R.; Batchelor, L. J.; Guillot, R.; Zakhia, G.; Barra, A.-L.; Wernsdorfer, W.; Guihéry, N.; Mallah, T. Ising-type magnetic anisotropy and single molecule magnet behaviour in mononuclear trigonal bipyramidal Co(II) complexes. *Chem. Sci.* **2014**, *5*, 3418–3424.
- (9) Amoza, M.; Maxwell, L.; Aliaga-Alcalde, N.; Gómez-Coca, S.; Ruiz, E. Spin-Phonon Coupling and Slow-Magnetic Relaxation in Pristine Ferrocenium. *Chem. Eur. J.* **2021**, *27*, 16440–16447.
